# Supplementary material for: Prolonged experimental drought reduces plant hydraulic conductance and transpiration and increases mortality in a piñon–juniper woodland
Source: PubMed Central journal article supplement (PMC4409411; doi:10.1002/ece3.1422), 2015-03-23

**Supplemental - Figure S1.** Relationship between nocturnal sap-flow output ( $\Delta T$  max, y-axis) and nocturnal *VPD* (x-axis) for a 48 day period during conditions with higher *VWC*. Each probe (per species) exhibits the typical pattern seen in the overwhelming majority of sensors.

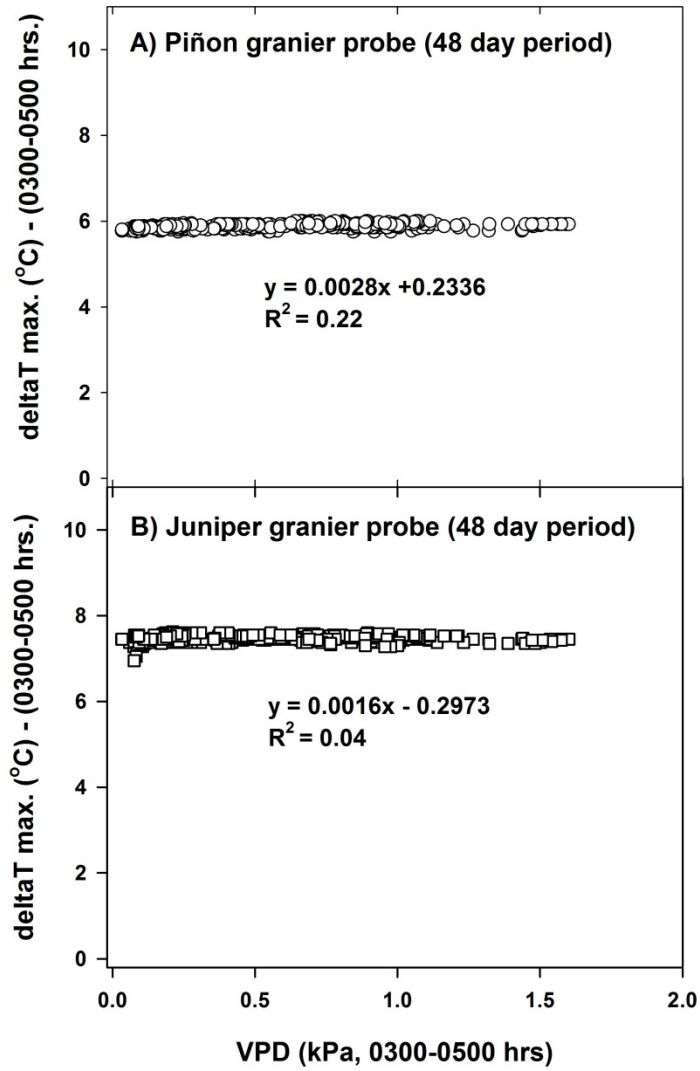

Supplement: ece30005-1618-sd1.pdf [file ece30005-1618-sd1.pdf]
