# Supplementary material for: Prolonged experimental drought reduces plant hydraulic conductance and transpiration and increases mortality in a piñon–juniper woodland
Source: PubMed Central journal article supplement (PMC4409411; doi:10.1002/ece3.1422), 2015-03-23

**Supplemental - Figure S3.** Annual sap-flow ( $\text{kg cm}^{-2} \text{ yr}^{-1}$ , plot mean) by species and treatment across the 2008 through 2012 period. Annual sap-flow estimates were based on measurements from one replicate block ( $n=1$ ) in years 2008 and 2009, and all replicate blocks ( $n=3$ ) in years 2010 through 2012. For years 2010-2012, error bars ( $\pm 1$  S.E.) represent the variation between plot means (by treatment).

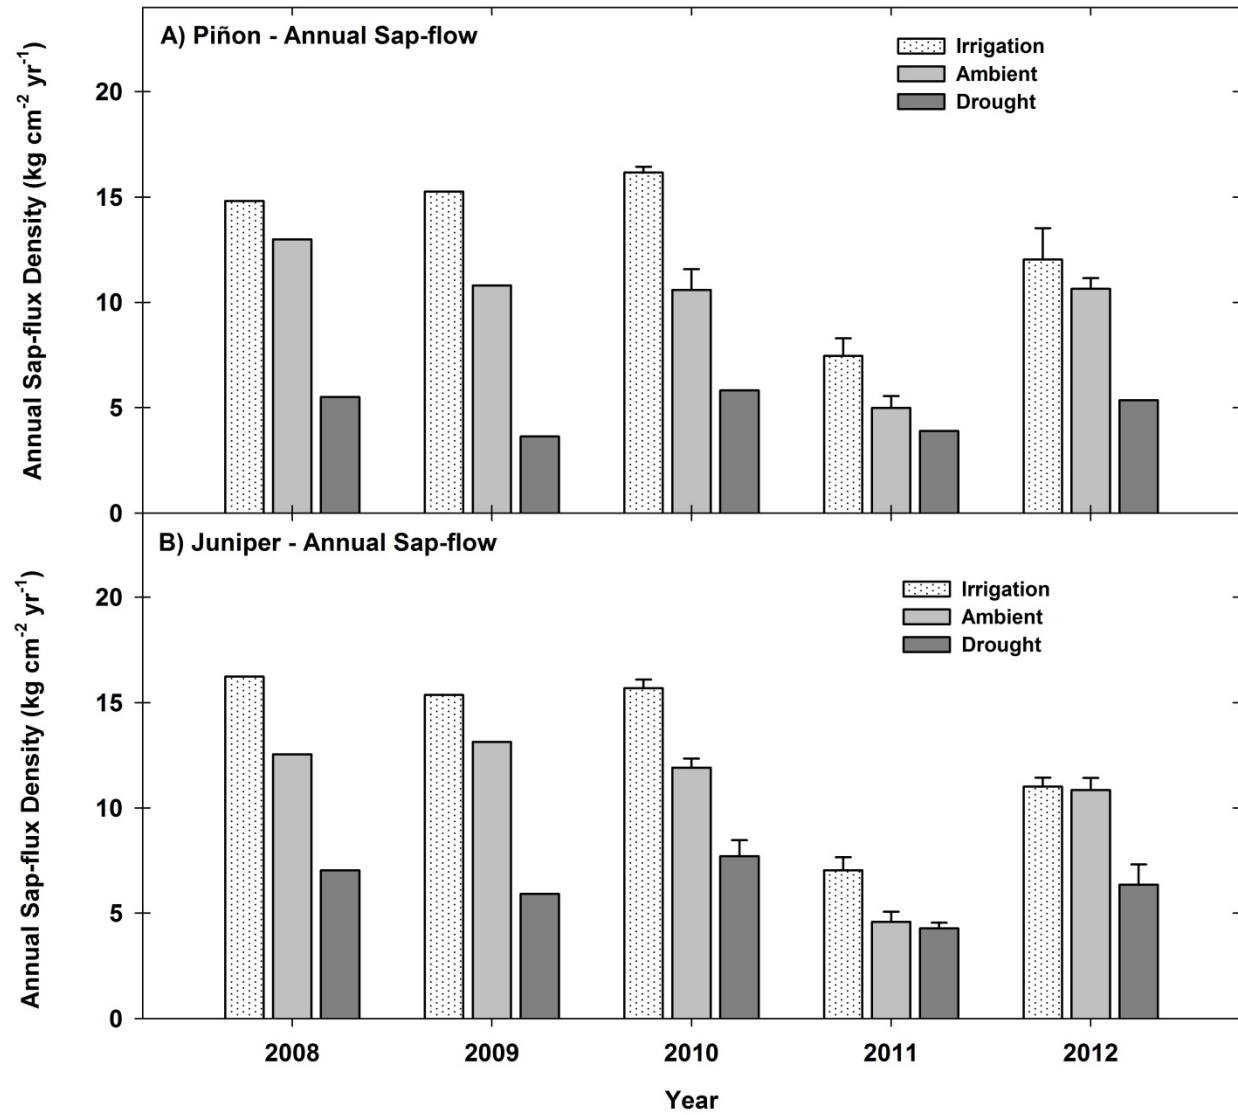

Supplement: ece30005-1618-sd3.pdf [file ece30005-1618-sd3.pdf]
