# Supplementary material for: Prolonged experimental drought reduces plant hydraulic conductance and transpiration and increases mortality in a piñon–juniper woodland
Source: PubMed Central journal article supplement (PMC4409411; doi:10.1002/ece3.1422), 2015-03-23

**Supplemental - Figure S4.** Stem diameter distribution across all plots for piñon and juniper in year 2007. Error bars ( $\pm 1$  S.E.) represent the variation between  $n=12$  plots (across all treatments). Values are the count per hectare by 5 cm diameter classes (for example, the 15 cm class represents all stems ranging from 10.0 to 14.99 cm in diameter). Stems were measured and counted down to a minimum stem diameter of 0.5 cm for the 0 to 4.99 cm diameter class.

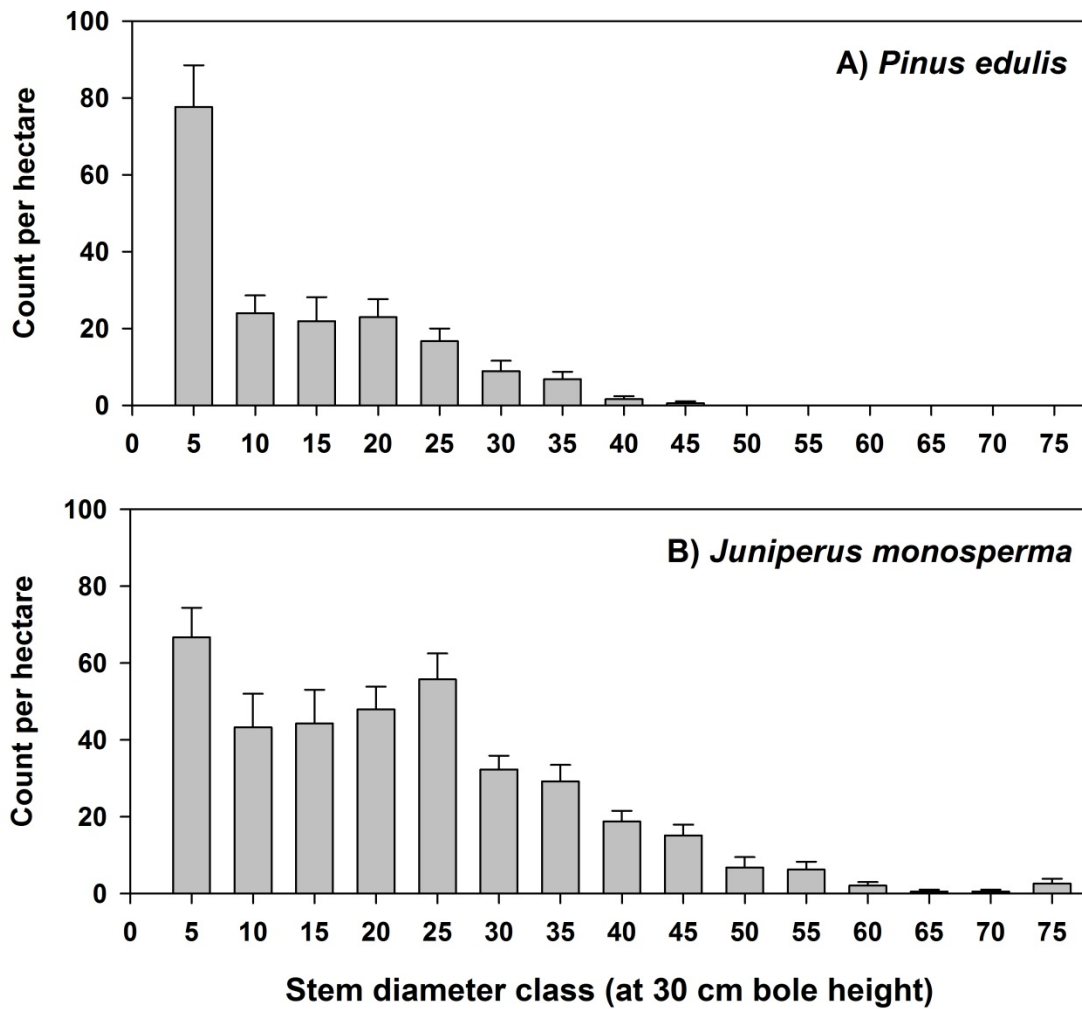

Supplement: ece30005-1618-sd4.pdf [file ece30005-1618-sd4.pdf]
