# Supplementary material for: Prolonged experimental drought reduces plant hydraulic conductance and transpiration and increases mortality in a piñon–juniper woodland
Source: PubMed Central journal article supplement (PMC4409411; doi:10.1002/ece3.1422), 2015-03-23

**Supplemental - Figure S7.** Midday foliar water potentials ( $\Psi_{MD}$ ) for piñon (A) and juniper (B) across irrigation, ambient, and drought treatments during the 5+ yr study period. Means are  $\pm 1$  S.E. Horizontal lines indicate 5+ yr treatment mean for each species as follows: irrigation (---), ambient (—), and drought (---).

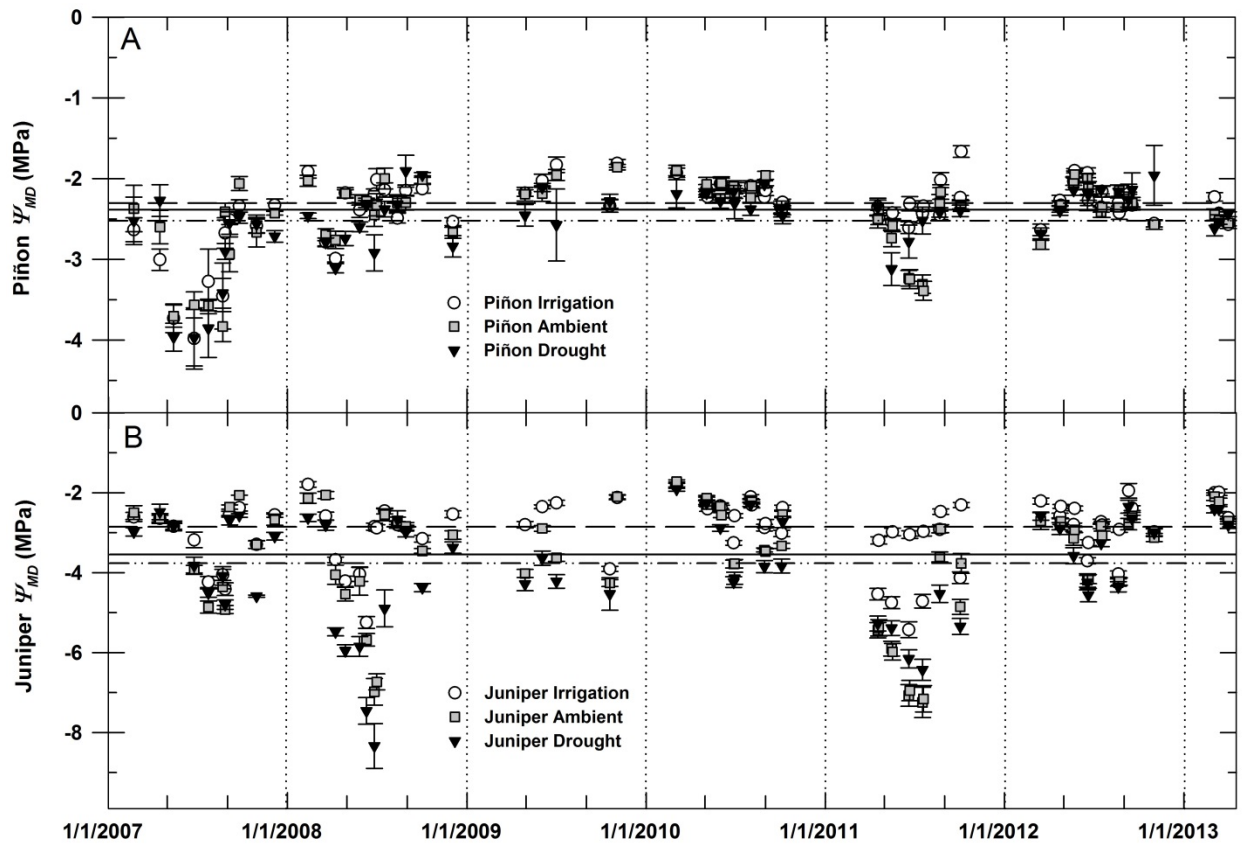

Supplement: ece30005-1618-sd7.pdf [file ece30005-1618-sd7.pdf]
