# Supplementary material for: Prolonged experimental drought reduces plant hydraulic conductance and transpiration and increases mortality in a piñon–juniper woodland
Source: PubMed Central journal article supplement (PMC4409411; doi:10.1002/ece3.1422), 2015-03-23

**Supplemental - Figure S9.** Relationship between  $k_s$  and predawn water potential ( $\Psi_{PD}$ ) across the 5+ yr study period for each species and treatment (panel A). Response of  $\Delta\Psi$  ( $\Psi_{PD} - \Psi_{MD}$ ) to plant water stress ( $\Psi_{PD}$ ) across the study period (panel B). Values are mean  $\pm$  1 S.E. Regression fits are the best fit relationship using a two parameter exponential function of the form;  $y = ae^{bx}$ .

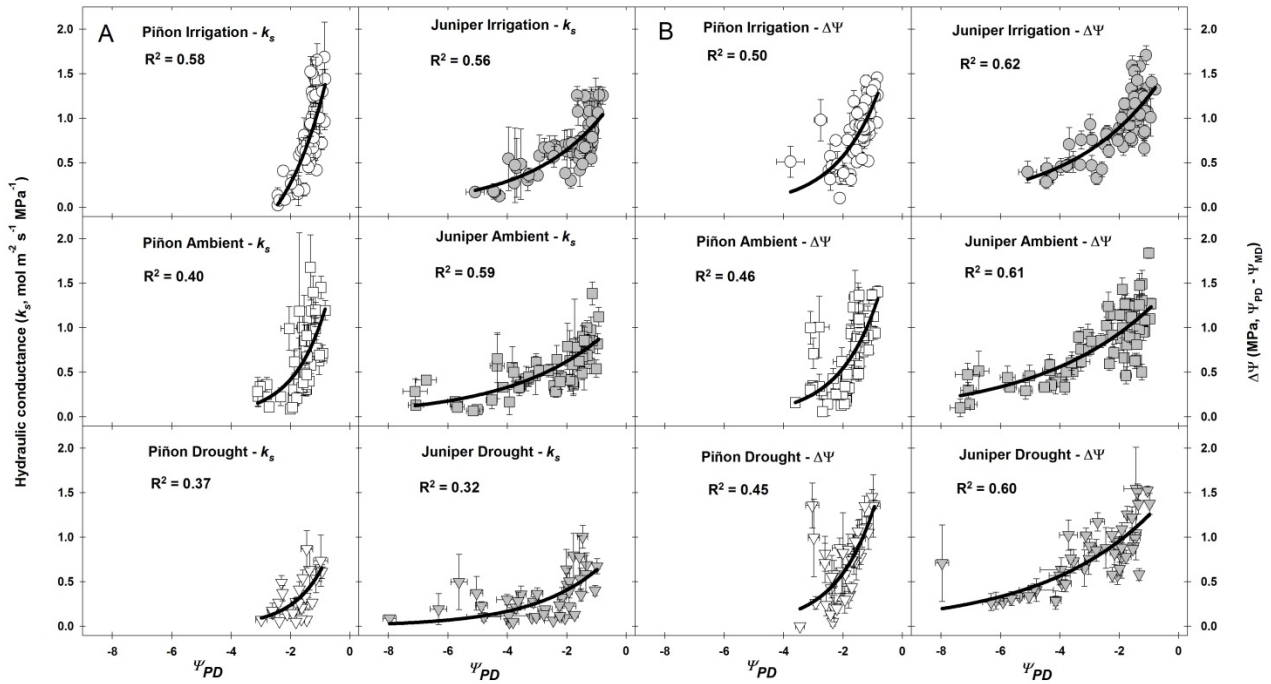

Supplement: ece30005-1618-sd9.pdf [file ece30005-1618-sd9.pdf]
