# Supplementary material for: Prolonged experimental drought reduces plant hydraulic conductance and transpiration and increases mortality in a piñon–juniper woodland
Source: PubMed Central journal article supplement (PMC4409411; doi:10.1002/ece3.1422), 2015-03-23
Supplement: ece30005-1618-sd12.pdf [file ece30005-1618-sd12.pdf]

## Supplemental Note S2.

Sapwood and leaf area allometric models for piñon and juniper trees developed in year 2007 from destructively harvested branches and/or small stems sampled from off plot trees growing within 1 km of the study site. Destructively harvested branches used to develop allometric relationships ranged in diameter from 1.8 to 15.9 cm for piñon (n=16 samples), and from 1.7 to 18.6 cm for juniper (n=24 samples).

### Allometric models (x = stem diameter, cm)

model form;  $y = ax^b$

| Piñon models | Sapwood model              | Leaf area model             |
|--------------|----------------------------|-----------------------------|
| coefficients | sapwood (cm <sup>2</sup> ) | leaf area (m <sup>2</sup> ) |
| a            | 0.8112                     | 0.0889                      |
| b            | 1.7341                     | 1.9172                      |
| model fit    | R <sup>2</sup> = 0.9066    | R <sup>2</sup> = 0.9687     |

| Juniper models | Sapwood model              | Leaf area model             |
|----------------|----------------------------|-----------------------------|
| coefficients   | sapwood (cm <sup>2</sup> ) | leaf area (m <sup>2</sup> ) |
| a              | 0.8227                     | 0.0773                      |
| b              | 1.3903                     | 1.686                       |
| model fit      | R <sup>2</sup> = 0.8588    | R <sup>2</sup> = 0.9148     |
