# Supplementary material for: Prolonged experimental drought reduces plant hydraulic conductance and transpiration and increases mortality in a piñon–juniper woodland
Source: PubMed Central journal article supplement (PMC4409411; doi:10.1002/ece3.1422), 2015-03-23
Supplement: ece30005-1618-sd13.pdf [file ece30005-1618-sd13.pdf]

**Supplemental Table S1.** Nocturnal and mid-morning stomatal conductance (Leaf  $g_s$ ) rates for *P. edulis* and *J. monosperma* trees measured across three separate dates that varied in soil moisture content (VWC%, plot mean). Leaf  $g_s$  was measured with a LI-1600 porometer (Licor, Inc.) during both pre-monsoon and monsoon periods in irrigated, drought, and ambient treatment plots. Values are means +/- 1 S.E. n=5 trees per treatment were measured on each date.

| Species<br>&<br>Treatment | 8/12/2010<br>Leaf $g_s$ (mmol m <sup>-2</sup> s <sup>-1</sup> )<br>monsoon season w/o<br>irrigation (n=5) |              |                | 6/23/2011<br>Leaf $g_s$ (mmol m <sup>-2</sup> s <sup>-1</sup> )<br>pre-monsoon w/<br>irrigation (n=5) |              |               | 6/18/2012<br>Leaf $g_s$ (mmol m <sup>-2</sup> s <sup>-1</sup> )<br>pre-monsoon w/o<br>irrigation (n=5) |              |               |
|---------------------------|-----------------------------------------------------------------------------------------------------------|--------------|----------------|-------------------------------------------------------------------------------------------------------|--------------|---------------|--------------------------------------------------------------------------------------------------------|--------------|---------------|
|                           | <u>8-11am</u>                                                                                             | <u>1-5am</u> | <u>VWC</u>     | <u>8-11am</u>                                                                                         | <u>1-5am</u> | <u>VWC</u>    | <u>8-11am</u>                                                                                          | <u>1-5am</u> | <u>VWC</u>    |
| Piñon<br>(Irrigation)     | 112.3<br>(19.6)                                                                                           | 7.2<br>(2.6) | 10.4%<br>(0.9) | 35.3<br>(3.2)                                                                                         | 2.4<br>(0.7) | 8.5%<br>(1.0) | 5.6<br>(1.4)                                                                                           | 1.2<br>(0.4) | 3.7%<br>(0.6) |
| Piñon<br>(Drought)        | 62.9<br>(13.3)                                                                                            | 2.6<br>(0.8) | 5.4%<br>(0.5)  | 2.3<br>(0.8)                                                                                          | 0.5<br>(0.2) | < 2%          | 4.7<br>(0.7)                                                                                           | 0.6<br>(0.3) | 2.7%<br>(0.3) |
| Piñon<br>(Ambient)        | n/a                                                                                                       | n/a          | n/a            | n/a                                                                                                   | n/a          | n/a           | 6.2<br>(0.8)                                                                                           | 1.5<br>(0.5) | 3.8%<br>(0.8) |
| Juniper<br>(Irrigation)   | 92.2<br>(4.5)                                                                                             | 6.5<br>(2.0) | 10.4%<br>(0.9) | 38.8<br>(4.1)                                                                                         | 5.3<br>(1.4) | 8.5%<br>(1.0) | 13.0<br>(1.7)                                                                                          | 1.7<br>(0.5) | 3.7%<br>(0.6) |
| Juniper<br>(Drought)      | 60.8<br>(10.7)                                                                                            | 4.6<br>(0.6) | 5.4%<br>(0.5)  | 7.4<br>(1.8)                                                                                          | 0.4<br>(0.1) | < 2%          | 13.6<br>(1.7)                                                                                          | 1.2<br>(0.3) | 2.7%<br>(0.3) |
| Juniper<br>(Ambient)      | n/a                                                                                                       | n/a          | n/a            | n/a                                                                                                   | n/a          | n/a           | 19.1<br>(1.2)                                                                                          | 2.9<br>(0.2) | 3.8%<br>(0.8) |
