# Supplementary material for: Prolonged experimental drought reduces plant hydraulic conductance and transpiration and increases mortality in a piñon–juniper woodland
Source: PubMed Central journal article supplement (PMC4409411; doi:10.1002/ece3.1422), 2015-03-23
Supplement: ece30005-1618-sd14.pdf [file ece30005-1618-sd14.pdf]

**Supplemental Table S2.** ANCOVA model results for linear mixed model analysis of relationships between: 1)  $k_s$  vs. predawn-Psi ( $\Psi_{PD}$ ), 2) midday leaf  $\Delta\Psi$  vs.  $\Psi_{PD}$ , 3) midday  $J_S$  vs.  $\Psi_{PD}$ , and 4) midday  $J_S$  vs. midday  $\Delta\Psi$ . \*Significant differences for ambient treatments indicate that intercepts and slopes are significantly different from zero. <sup>a</sup>Significant differences for irrigation and drought treatment indicate a significant difference from ambient treatment model estimates for a specific parameter. Significant differences at a threshold value of  $p \leq 0.05$  are indicated in bold text.

| Species | Treatment  | Transformation Type | Predictor Variable (x) | Response Variable (y) | Intercept-Est. & (SE) | Slope-Est. & (SE) | Intercept Pr >  t  & t-value           | Slope Pr >  t  & t-value               |
|---------|------------|---------------------|------------------------|-----------------------|-----------------------|-------------------|----------------------------------------|----------------------------------------|
| Piñon   | Irrigation | none                | $\Psi_{PD}$            | $k_s$                 | 1.438 (0.118)         | 0.468 (0.080)     | <b>p=0.0082<sup>a</sup> (2.65)</b>     | <b>p=0.0344<sup>a</sup> (2.12)</b>     |
| Piñon   | Ambient    | none                | $\Psi_{PD}$            | $k_s$                 | 1.126 (0.083)         | 0.298 (0.052)     | <b>p&lt;0.0001* (13.5)</b>             | <b>p&lt;0.0001* (5.68)</b>             |
| Piñon   | Drought    | none                | $\Psi_{PD}$            | $k_s$                 | 0.610 (0.184)         | 0.158 (0.104)     | <b>p=0.0050<sup>a</sup> (-2.81)</b>    | p=0.1806 (-1.34)                       |
| Juniper | Irrigation | none                | $\Psi_{PD}$            | $k_s$                 | 1.094 (0.061)         | 0.210 (0.024)     | <b>p=0.0012<sup>a</sup> (3.26)</b>     | <b>p=0.0008<sup>a</sup> (3.36)</b>     |
| Juniper | Ambient    | none                | $\Psi_{PD}$            | $k_s$                 | 0.896 (0.044)         | 0.131 (0.015)     | <b>p&lt;0.0001* (20.4)</b>             | <b>p&lt;0.0001* (9.07)</b>             |
| Juniper | Drought    | none                | $\Psi_{PD}$            | $k_s$                 | 0.589 (0.071)         | 0.091 (0.024)     | <b>p&lt;0.0001<sup>a</sup> (-4.33)</b> | p=0.0870 (-1.71)                       |
| Piñon   | Irrigation | none                | $\Psi_{PD}$            | $\Delta\Psi$          | 1.695 (0.063)         | 0.580 (0.038)     | p=0.4981 (0.68)                        | p=0.5223 (0.64)                        |
| Piñon   | Ambient    | none                | $\Psi_{PD}$            | $\Delta\Psi$          | 1.652 (0.046)         | 0.556 (0.025)     | <b>p&lt;0.0001* (35.6)</b>             | <b>p&lt;0.0001* (22.0)</b>             |
| Piñon   | Drought    | none                | $\Psi_{PD}$            | $\Delta\Psi$          | 1.510 (0.102)         | 0.446 (0.052)     | p=0.1606 (-1.40)                       | <b>p=0.0353<sup>a</sup> (-2.11)</b>    |
| Juniper | Irrigation | none                | $\Psi_{PD}$            | $\Delta\Psi$          | 1.475 (0.045)         | 0.266 (0.017)     | <b>p=0.0238<sup>a</sup> (2.26)</b>     | <b>p&lt;0.0001<sup>a</sup> (3.92)</b>  |
| Juniper | Ambient    | none                | $\Psi_{PD}$            | $\Delta\Psi$          | 1.374 (0.032)         | 0.199 (0.010)     | <b>p&lt;0.0001* (43.3)</b>             | <b>p&lt;0.0001* (19.5)</b>             |
| Juniper | Drought    | none                | $\Psi_{PD}$            | $\Delta\Psi$          | 1.280 (0.049)         | 0.176 (0.015)     | p=0.0557 (-1.92)                       | p=0.1188 (-1.56)                       |
| Piñon   | Irrigation | none                | $\Psi_{PD}$            | midday $J_S$          | 24.97 (1.144)         | 8.242 (0.596)     | <b>p=0.0021<sup>a</sup> (3.08)</b>     | p=0.0553 (1.92)                        |
| Piñon   | Ambient    | none                | $\Psi_{PD}$            | midday $J_S$          | 21.45 (0.872)         | 7.099 (0.421)     | <b>p&lt;0.0001* (24.6)</b>             | <b>p&lt;0.0001* (16.9)</b>             |
| Piñon   | Drought    | none                | $\Psi_{PD}$            | midday $J_S$          | 10.49 (1.856)         | 3.220 (0.831)     | <b>p&lt;0.0001<sup>a</sup> (-5.90)</b> | <b>p&lt;0.0001<sup>a</sup> (-4.67)</b> |
| Juniper | Irrigation | none                | $\Psi_{PD}$            | midday $J_S$          | 20.12 (0.834)         | 4.008 (0.221)     | <b>p&lt;0.0001<sup>a</sup> (4.68)</b>  | <b>p&lt;0.0001<sup>a</sup> (7.12)</b>  |
| Juniper | Ambient    | none                | $\Psi_{PD}$            | midday $J_S$          | 16.22 (0.611)         | 2.435 (0.140)     | <b>p&lt;0.0001* (26.5)</b>             | <b>p&lt;0.0001* (17.4)</b>             |
| Juniper | Drought    | none                | $\Psi_{PD}$            | midday $J_S$          | 8.880 (0.921)         | 1.231 (0.212)     | <b>p&lt;0.0001<sup>a</sup> (-7.96)</b> | <b>p&lt;0.0001<sup>a</sup> (-5.67)</b> |
| Piñon   | Irrigation | none                | $\Delta\Psi$           | midday $J_S$          | 4.362 (0.910)         | 10.31 (0.872)     | <b>p&lt;0.0261<sup>a</sup> (2.23)</b>  | p=0.4391 (0.77)                        |
| Piñon   | Ambient    | none                | $\Delta\Psi$           | midday $J_S$          | 2.336 (0.585)         | 9.633 (0.595)     | <b>p&lt;0.0001* (4.00)</b>             | <b>p&lt;0.0001* (16.2)</b>             |
| Piñon   | Drought    | none                | $\Delta\Psi$           | midday $J_S$          | 1.083 (1.220)         | 4.666 (1.330)     | p=0.3045 (-1.03)                       | <b>p=0.0002<sup>a</sup> (-3.73)</b>    |
| Juniper | Irrigation | none                | $\Delta\Psi$           | midday $J_S$          | 5.289 (0.939)         | 7.497 (0.718)     | p=0.9963 (-0.00)                       | <b>p=0.0002<sup>a</sup> (3.72)</b>     |
| Juniper | Ambient    | none                | $\Delta\Psi$           | midday $J_S$          | 5.293 (0.642)         | 4.824 (0.485)     | <b>p&lt;0.0001* (8.24)</b>             | <b>p&lt;0.0001* (9.96)</b>             |
| Juniper | Drought    | none                | $\Delta\Psi$           | midday $J_S$          | 2.693 (0.943)         | 3.134 (0.840)     | <b>p=0.0059<sup>a</sup> (-2.76)</b>    | <b>p=0.0443<sup>a</sup> (-2.01)</b>    |
