# Supplementary material for: Prolonged experimental drought reduces plant hydraulic conductance and transpiration and increases mortality in a piñon–juniper woodland
Source: PubMed Central journal article supplement (PMC4409411; doi:10.1002/ece3.1422), 2015-03-23
Supplement: ece30005-1618-sd15.pdf [file ece30005-1618-sd15.pdf]

**Supplemental Table S3.** ANCOVA model results for analysis with transformed response variables. Linear mixed model analysis of relationships between: 1)  $k_s$  vs. predawn-Psi ( $\Psi_{PD}$ ), 2) midday leaf  $\Delta\Psi$  vs.  $\Psi_{PD}$ , 3) midday  $J_S$  vs.  $\Psi_{PD}$ , and 4) midday  $J_S$  vs. midday  $\Delta\Psi$ . \*Significant differences for ambient treatments indicate that intercepts and slopes are significantly different from zero. <sup>a</sup>Significant differences for irrigation and drought treatment indicate a significant difference from ambient treatment model estimates for a specific parameter. Significant differences at a threshold value of  $p \leq 0.05$  are indicated in bold text.

| Species | Treatment  | Transformation Type | Predictor Variable (x) | Response Variable (y) | Intercept-Est. & (SE) | Slope-Est. & (SE) | Intercept Pr >  t  & t-value           | Slope Pr >  t  & t-value               |
|---------|------------|---------------------|------------------------|-----------------------|-----------------------|-------------------|----------------------------------------|----------------------------------------|
| Piñon   | Irrigation | ln(y+1)             | $\Psi_{PD}$            | $k_s$                 | 0.944 (0.063)         | 0.294 (0.043)     | <b>p=0.0086<sup>a</sup> (2.63)</b>     | <b>p=0.0297<sup>a</sup> (2.18)</b>     |
| Piñon   | Ambient    | ln(y+1)             | $\Psi_{PD}$            | $k_s$                 | 0.778 (0.045)         | 0.201 (0.028)     | <b>p&lt;0.0001* (17.3)</b>             | <b>p&lt;0.0001* (7.14)</b>             |
| Piñon   | Drought    | ln(y+1)             | $\Psi_{PD}$            | $k_s$                 | 0.472 (0.098)         | 0.119 (0.056)     | <b>p=0.0019<sup>a</sup> (-3.12)</b>    | p=0.1388 (-1.48)                       |
| Juniper | Irrigation | ln(y+1)             | $\Psi_{PD}$            | $k_s$                 | 0.716 (0.058)         | 0.121 (0.012)     | <b>p=0.0481<sup>a</sup> (2.01)</b>     | <b>p=0.0003<sup>a</sup> (3.66)</b>     |
| Juniper | Ambient    | ln(y+1)             | $\Psi_{PD}$            | $k_s$                 | 0.599 (0.041)         | 0.076 (0.007)     | <b>p&lt;0.0001* (14.5)</b>             | <b>p&lt;0.0001* (10.3)</b>             |
| Juniper | Drought    | ln(y+1)             | $\Psi_{PD}$            | $k_s$                 | 0.408 (0.058)         | 0.055 (0.012)     | <b>p=0.0012<sup>a</sup> (-3.32)</b>    | p=0.0776 (-1.77)                       |
| Piñon   | Irrigation | ln(y+1)             | $\Psi_{PD}$            | $\Delta\Psi$          | 1.085 (0.037)         | 0.343 (0.022)     | p=0.5127 (0.65)                        | p=0.6250 (0.49)                        |
| Piñon   | Ambient    | ln(y+1)             | $\Psi_{PD}$            | $\Delta\Psi$          | 1.061 (0.027)         | 0.333 (0.015)     | <b>p&lt;0.0001* (39.0)</b>             | <b>p&lt;0.0001* (22.7)</b>             |
| Piñon   | Drought    | ln(y+1)             | $\Psi_{PD}$            | $\Delta\Psi$          | 0.978 (0.058)         | 0.270 (0.030)     | p=0.1560 (-1.42)                       | <b>p=0.0355<sup>a</sup> (-2.10)</b>    |
| Juniper | Irrigation | ln(y+1)             | $\Psi_{PD}$            | $\Delta\Psi$          | 0.939 (0.026)         | 0.152 (0.009)     | <b>p=0.0157<sup>a</sup> (2.43)</b>     | <b>p&lt;0.0001<sup>a</sup> (4.45)</b>  |
| Juniper | Ambient    | ln(y+1)             | $\Psi_{PD}$            | $\Delta\Psi$          | 0.877 (0.018)         | 0.114 (0.005)     | <b>p&lt;0.0001* (48.3)</b>             | <b>p&lt;0.0001* (22.3)</b>             |
| Juniper | Drought    | ln(y+1)             | $\Psi_{PD}$            | $\Delta\Psi$          | 0.839 (0.027)         | 0.105 (0.008)     | p=0.1668 (-1.39)                       | p=0.2192 (-1.23)                       |
| Piñon   | Irrigation | sqrt(y)             | $\Psi_{PD}$            | midday $J_S$          | 5.273 (0.219)         | 1.355 (0.096)     | <b>p=0.0336<sup>a</sup> (2.14)</b>     | p=0.1984 (1.29)                        |
| Piñon   | Ambient    | sqrt(y)             | $\Psi_{PD}$            | midday $J_S$          | 4.805 (0.163)         | 1.232 (0.068)     | <b>p&lt;0.0001* (29.5)</b>             | <b>p&lt;0.0001* (18.1)</b>             |
| Piñon   | Drought    | sqrt(y)             | $\Psi_{PD}$            | midday $J_S$          | 3.281 (0.335)         | 0.706 (0.135)     | <b>p&lt;0.0001<sup>a</sup> (-4.56)</b> | <b>p=0.0001<sup>a</sup> (-3.89)</b>    |
| Juniper | Irrigation | sqrt(y)             | $\Psi_{PD}$            | midday $J_S$          | 4.557 (0.243)         | 0.677 (0.032)     | <b>p=0.0014<sup>a</sup> (3.31)</b>     | <b>p&lt;0.0001<sup>a</sup> (9.84)</b>  |
| Juniper | Ambient    | sqrt(y)             | $\Psi_{PD}$            | midday $J_S$          | 3.751 (0.174)         | 0.358 (0.020)     | <b>p&lt;0.0001* (21.6)</b>             | <b>p&lt;0.0001* (17.8)</b>             |
| Juniper | Drought    | sqrt(y)             | $\Psi_{PD}$            | midday $J_S$          | 2.573 (0.235)         | 0.205 (0.031)     | <b>p&lt;0.0001<sup>a</sup> (-5.01)</b> | <b>p&lt;0.0001<sup>a</sup> (-4.94)</b> |
| Piñon   | Irrigation | sqrt(y)             | $\Delta\Psi$           | midday $J_S$          | 1.978 (0.196)         | 1.586 (0.131)     | <b>p=0.0078<sup>a</sup> (2.73)</b>     | p=0.2615 (-1.12)                       |
| Piñon   | Ambient    | sqrt(y)             | $\Delta\Psi$           | midday $J_S$          | 1.444 (0.132)         | 1.733 (0.089)     | <b>p&lt;0.0001* (10.9)</b>             | <b>p&lt;0.0001* (19.5)</b>             |
| Piñon   | Drought    | sqrt(y)             | $\Delta\Psi$           | midday $J_S$          | 1.158 (0.238)         | 1.075 (0.201)     | p=0.2327 (-1.20)                       | <b>p=0.0011<sup>a</sup> (-3.27)</b>    |
| Juniper | Irrigation | sqrt(y)             | $\Delta\Psi$           | midday $J_S$          | 2.200 (0.266)         | 1.134 (0.103)     | p=0.7709 (0.29)                        | <b>p=0.0008<sup>a</sup> (3.36)</b>     |
| Juniper | Ambient    | sqrt(y)             | $\Delta\Psi$           | midday $J_S$          | 2.123 (0.1871)        | 0.787 (0.069)     | <b>p&lt;0.0001* (11.4)</b>             | <b>p&lt;0.0001* (11.3)</b>             |
| Juniper | Drought    | sqrt(y)             | $\Delta\Psi$           | midday $J_S$          | 1.531 (0.250)         | 0.544 (0.120)     | <b>p=0.0202<sup>a</sup> (-2.37)</b>    | <b>p=0.0426<sup>a</sup> (-2.03)</b>    |
